# Supplementary material for: Expert consensus on endoscopic papillectomy using a Delphi process
Source: PubMed Central journal article supplement (PMC8878358; doi:10.1016/j.gie.2021.04.009), 2021-04-19
Supplement: NIHMS1757345-supplement-1.pdf [file NIHMS1757345-supplement-1.pdf]

## APPENDIX

## EMBASE (OVID)

Database(s): Embase Classic+Embase 1947 to 2020 December 17

| # | Searches                                                                            | Results    |
|---|-------------------------------------------------------------------------------------|------------|
| 1 | (endoscopic ampullectom* or papillectom*).ti,ab,kw.                                 | 692        |
| 2 | ((endoscopic resect* or endoscopic excision*) and (papilla* or ampulla*)).ti,ab,kw. | 573        |
| 3 | 1 or 2                                                                              | 1114       |
| 4 | limit 3 to (conference abstract status and yr="1883 - 2014")                        | 194        |
| 5 | 3 or 4                                                                              | 920        |
| 6 | limit 5 to English language                                                         | <b>782</b> |

## PubMed

Search performed on 2020 December 18

| # | Searches                                                                                        | Results    |
|---|-------------------------------------------------------------------------------------------------|------------|
| 1 | (endoscopic resect*[tiab] OR endoscopic excision*[tiab]) AND (papilla*[tiab] OR ampulla*[tiab]) | 262        |
| 2 | (endoscopic ampullectom*[tiab] OR papillectom*[tiab])                                           | 326        |
| 3 | 1 OR 2                                                                                          | <b>525</b> |

## Flowchart in- and exclusion

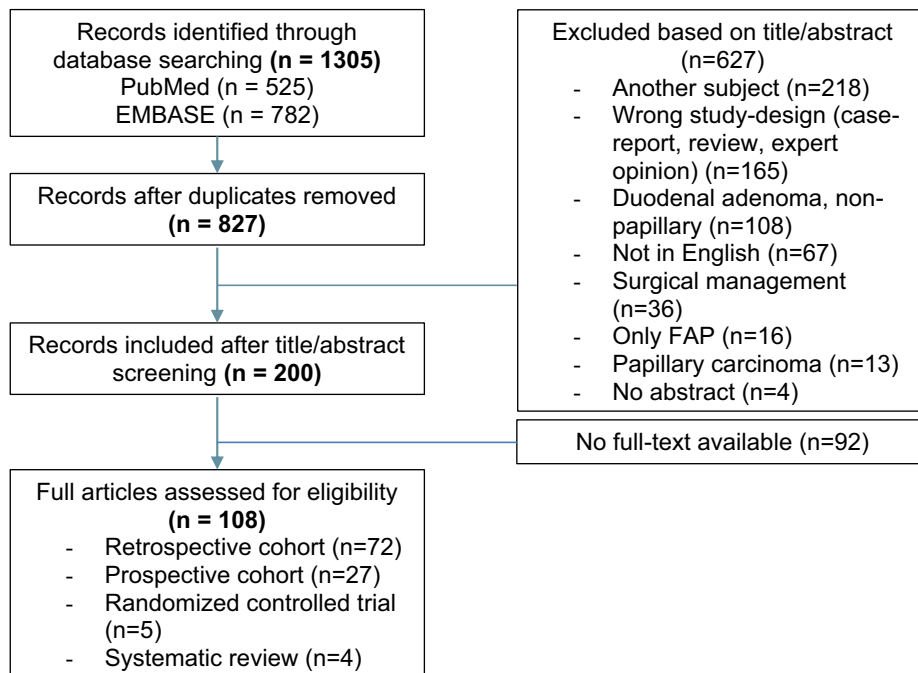

Supplementary Figure 1. Literature search.

SUPPLEMENTARY TABLE 1. Survey round 1

| Question                                                      | Agreement |
|---------------------------------------------------------------|-----------|
| Expertise                                                     |           |
| 1. In which country do you work?                              |           |
| a. United States of America                                   | 29%       |
| b. Japan                                                      | 14%       |
| c. France                                                     | 11%       |
| d. Korea                                                      | 11%       |
| e. Germany                                                    | 7%        |
| f. Italy                                                      | 7%        |
| g. Netherlands                                                | 7%        |
| h. Belgium                                                    | 4%        |
| i. Finland                                                    | 4%        |
| j. Switzerland                                                | 4%        |
| k. United Kingdom                                             | 4%        |
| 2. In which type of practice do you primarily work?           |           |
| a. Academic practice                                          | 86%       |
| b. Private practice                                           | 11%       |
| c. Nonacademic practice                                       | 7%        |
| d. Other                                                      | 4%        |
| 3. How many years have you been in practice?                  |           |
| a. <5 years                                                   | 0%        |
| b. 5-10 years                                                 | 7%        |
| c. 10-20 years                                                | 25%       |
| d. >20 years                                                  | 68%       |
| 4. Do you perform colonoscopies every week?                   |           |
| a. Yes                                                        | 82%       |
| b. No                                                         | 18%       |
| 5. How many colonoscopies do you perform every week? (n = 23) |           |
| a. <5 per week                                                | 30%       |
| b. 5-10 per week                                              | 35%       |
| c. 10-20 per week                                             | 22%       |
| d. >20 per week                                               | 13%       |
| 6. Do you perform basic polypectomy?                          |           |
| a. Yes                                                        | 93%       |
| b. No                                                         | 7%        |
| 7. Do you perform colonic EMR?                                |           |
| a. Yes                                                        | 82%       |
| b. No                                                         | 18%       |
| 8. How many ERCPs do you perform yearly?                      |           |
| a. <100 per year                                              | 4%        |
| b. 100-200 per year                                           | 21%       |
| c. 200-400 per year                                           | 36%       |
| d. >400 per year                                              | 39%       |

(continued on the next page)

SUPPLEMENTARY TABLE 1. Continued

| Question                                                                                 | Agreement |
|------------------------------------------------------------------------------------------|-----------|
| 9. How many endoscopic papillectomies are performed yearly in your center?               |           |
| a. <5 per year                                                                           | 4%        |
| b. 5-10 per year                                                                         | 18%       |
| c. 10-20 per year                                                                        | 36%       |
| d. >20 per year                                                                          | 43%       |
| 10. How many endoscopic papillectomies did you perform in your career?                   |           |
| a. <5 in total                                                                           | 0%        |
| b. 5-10 in total                                                                         | 4%        |
| c. 10-30 in total                                                                        | 7%        |
| d. >30 in total                                                                          | 89%       |
| 11. Do you perform EUS?                                                                  |           |
| a. Yes                                                                                   | 79%       |
| b. No                                                                                    | 21%       |
| 12. How many EUS do you perform yearly? (n = 21)                                         |           |
| a. <50 per year                                                                          | 5%        |
| b. 50-100 per year                                                                       | 5%        |
| c. 100-200 per year                                                                      | 9%        |
| d. >200 per year                                                                         | 82%       |
| <b>Diagnostic workup</b>                                                                 |           |
| 1. Do you get patients referred to perform an endoscopic papillectomy?                   |           |
| a. Yes                                                                                   | 100%      |
| b. No                                                                                    | 0%        |
| 2. Which diagnostic modalities are usually already performed by the referring physician? |           |
| a. CT                                                                                    | 50%       |
| b. EUS                                                                                   | 29%       |
| c. MRCP                                                                                  | 29%       |
| d. Cholangiography                                                                       | 7%        |
| e. None of the above                                                                     | 25%       |
| f. Other                                                                                 |           |
| i. Gastroduodenoscopy                                                                    | 29%       |
| 3. What are possible reasons to perform a CT before resection?                           |           |
| a. Part of the standard diagnostic workup                                                | 43%       |
| b. Jaundice                                                                              | 64%       |
| c. Cholestatic laboratory features, without clinical signs of jaundice                   | 43%       |
| d. Significant weight loss                                                               | 57%       |
| e. Double duct sign on other imaging                                                     | 61%       |
| f. Age older than 50                                                                     | 11%       |
| g. Large (>2 cm) adenoma                                                                 | 36%       |
| h. Endoscopic features of possible malignancy                                            | 79%       |
| i. Other                                                                                 | 7%        |
| 4. What are possible reasons to perform an MRCP before resection?                        |           |
| a. Part of the standard diagnostic workup                                                | 46%       |
| b. Jaundice                                                                              | 71%       |
| c. Cholestatic laboratory features, without clinical signs of jaundice                   | 68%       |
| d. Significant weight loss                                                               | 36%       |

(continued on the next page)

SUPPLEMENTARY TABLE 1. Continued

| Question                                                                                                                                             | Agreement |
|------------------------------------------------------------------------------------------------------------------------------------------------------|-----------|
| e. Double duct sign on other imaging                                                                                                                 | 57%       |
| f. Age older than 50                                                                                                                                 | 7%        |
| g. Large (>2 cm) adenoma                                                                                                                             | 43%       |
| h. Endoscopic features of possible malignancy                                                                                                        | 54%       |
| i. Other                                                                                                                                             | 11%       |
| 5. What are possible reasons to perform an EUS before resection?                                                                                     |           |
| a. Part of the standard diagnostic workup                                                                                                            | 50%       |
| b. Jaundice                                                                                                                                          | 61%       |
| c. Cholestatic laboratory features, without clinical signs of jaundice                                                                               | 57%       |
| d. Significant weight loss                                                                                                                           | 39%       |
| e. Double duct sign on other imaging                                                                                                                 | 61%       |
| f. Age older than 50                                                                                                                                 | 11%       |
| g. Large (>2 cm) adenoma                                                                                                                             | 54%       |
| h. Endoscopic features of possible malignancy                                                                                                        | 75%       |
| i. Other                                                                                                                                             | 14%       |
| 6. What are possible reasons to perform a cholangiography before resection?                                                                          |           |
| a. Part of the standard diagnostic workup                                                                                                            | 25%       |
| b. Jaundice                                                                                                                                          | 54%       |
| c. Cholestatic laboratory features, without clinical signs of jaundice                                                                               | 29%       |
| d. Significant weight loss                                                                                                                           | 14%       |
| e. Double duct sign on other imaging                                                                                                                 | 50%       |
| f. Age older than 50                                                                                                                                 | 4%        |
| g. Large (>2 cm) adenoma                                                                                                                             | 14%       |
| h. Endoscopic features of possible malignancy                                                                                                        | 50%       |
| i. Other                                                                                                                                             | 21%       |
| 7. Do you routinely perform biopsy sampling before resection?                                                                                        |           |
| a. Yes                                                                                                                                               | 75%       |
| b. No                                                                                                                                                | 25%       |
| Lesion assessment and staging                                                                                                                        |           |
| 1. Do you use any kind of predefined classification system to determine if a lesion of the ampulla of Vater is most likely benign or malignant?      |           |
| a. Yes                                                                                                                                               | 11%       |
| b. No                                                                                                                                                | 89%       |
| 2. Which of the following characteristics on endoscopic imaging do you normally take into account to determine if the lesion is benign or malignant? |           |
| a. Presence of ulceration                                                                                                                            | 100%      |
| b. Aspect of the surface (granular vs smooth)                                                                                                        | 43%       |
| c. Friability                                                                                                                                        | 61%       |
| d. Firmness/rigidity                                                                                                                                 | 82%       |
| e. Mobility                                                                                                                                          | 61%       |
| f. Spontaneous bleeding                                                                                                                              | 54%       |
| g. Tumor size                                                                                                                                        | 57%       |
| h. Umbilicated lesion                                                                                                                                | 46%       |
| i. Other                                                                                                                                             | 0%        |

(continued on the next page)

SUPPLEMENTARY TABLE 1. Continued

| Question                                                                                                                                                                                                                                                     | Agreement |
|--------------------------------------------------------------------------------------------------------------------------------------------------------------------------------------------------------------------------------------------------------------|-----------|
| 3. Is there a specific tumor size that would raise your suspicion of the lesion being malignant?                                                                                                                                                             |           |
| a. Tumor size does not raise the suspicion of being malignant                                                                                                                                                                                                | 54%       |
| b. >1 cm                                                                                                                                                                                                                                                     | 0%        |
| c. >2 cm                                                                                                                                                                                                                                                     | 18%       |
| d. >3 cm                                                                                                                                                                                                                                                     | 21%       |
| e. >4 cm                                                                                                                                                                                                                                                     | 7%        |
| 4. Do you believe any of the characteristics mentioned below is specific enough by itself to define a lesion as most likely malignant? If yes, which?                                                                                                        |           |
| a. Ulceration                                                                                                                                                                                                                                                | 79%       |
| b. Smooth surface                                                                                                                                                                                                                                            | 4%        |
| c. Excessive friability                                                                                                                                                                                                                                      | 18%       |
| d. Firm consistency                                                                                                                                                                                                                                          | 32%       |
| e. Immobility                                                                                                                                                                                                                                                | 36%       |
| f. Spontaneous bleeding                                                                                                                                                                                                                                      | 14%       |
| g. Tumor size >4 cm                                                                                                                                                                                                                                          | 14%       |
| h. No, only a combination of the characteristics makes it possible to define a lesion as most likely malignant                                                                                                                                               | 21%       |
| i. Other                                                                                                                                                                                                                                                     | 4%        |
| 5. What are possible reasons to refer the patient for surgical management instead of performing endoscopic papillectomy?                                                                                                                                     |           |
| a. Jaundice (without evident signs of malignancy based on endoscopic imaging)                                                                                                                                                                                | 14%       |
| b. Ingrowth CBD $\leq$ 1 cm                                                                                                                                                                                                                                  | 14%       |
| c. Ingrowth PD $\leq$ 1 cm                                                                                                                                                                                                                                   | 21%       |
| d. Ingrowth CBD >1 cm                                                                                                                                                                                                                                        | 75%       |
| e. Ingrowth PD >1 cm                                                                                                                                                                                                                                         | 86%       |
| f. Tumor size >4 cm                                                                                                                                                                                                                                          | 18%       |
| g. Other                                                                                                                                                                                                                                                     | 18%       |
| 6. Do you use any advanced imaging techniques to distinguish adenomatous from nonadenomatous tissue?                                                                                                                                                         |           |
| a. Yes, always                                                                                                                                                                                                                                               | 29%       |
| b. Yes, sometimes                                                                                                                                                                                                                                            | 36%       |
| c. No, never                                                                                                                                                                                                                                                 | 36%       |
| 7. Do you look for signs of central retraction, also called an umbilicated lesion?                                                                                                                                                                           |           |
| a. Yes, this raises the suspicion of malignancy and patient should be referred for surgical management                                                                                                                                                       | 18%       |
| b. Yes, but the lesion could still be removed endoscopically if there are no further signs of malignancy                                                                                                                                                     | 75%       |
| c. No                                                                                                                                                                                                                                                        | 7%        |
| 8. Considering a fit, 70-year-old patient without any significant comorbidities, how would you treat the lesion if biopsy before resection shows only adenomatous tissue with low-grade dysplasia but endoscopic imaging shows possible signs of malignancy? |           |
| a. Endoscopically resect the lesion based on the biopsy sample result, disregarding the endoscopic imaging. Only refer the patient for surgery if the resected specimen shows malignancy.                                                                    | 82%       |
| b. Refer the patient for surgical management.                                                                                                                                                                                                                | 18%       |
| 9. When there is ingrowth in the CBD of more than 1 cm, would you consider endoscopic papillectomy in combination with RFA?                                                                                                                                  |           |
| a. Yes                                                                                                                                                                                                                                                       | 50%       |
| b. No, I would refer the patient for surgical treatment                                                                                                                                                                                                      | 50%       |
| Technical aspects                                                                                                                                                                                                                                            |           |
| 1. Where do you perform the resection of the lesion?                                                                                                                                                                                                         |           |
| a. At the plane of the duodenal wall                                                                                                                                                                                                                         | 100%      |
| b. Just above the plane of the duodenal wall                                                                                                                                                                                                                 | 0%        |

(continued on the next page)

SUPPLEMENTARY TABLE 1. Continued

| Question                                                                                                          | Agreement |
|-------------------------------------------------------------------------------------------------------------------|-----------|
| 2. What type of electrosurgical current do you use most often while performing endoscopic papillectomy?           |           |
| a. Pure coagulation current                                                                                       | 0%        |
| b. Pure cutting current                                                                                           | 14%       |
| c. Fractionated current (short regular pulses of cutting current integrated in background of coagulation current) | 79%       |
| d. Other                                                                                                          | 7%        |
| 3. Do you standard use submucosal injection before endoscopic papillectomy?                                       |           |
| a. Yes                                                                                                            | 4%        |
| b. No, only in case of lateral spreading                                                                          | 79%       |
| c. No                                                                                                             | 18%       |
| 4. Do you routinely perform pancreatic sphincterotomy?                                                            |           |
| a. Yes, always                                                                                                    | 14%       |
| b. Yes, sometimes                                                                                                 | 36%       |
| c. No, never                                                                                                      | 50%       |
| 5. When you perform pancreatic sphincterotomy do you in general perform it before or after resection? (n = 14)    |           |
| a. Before resection                                                                                               | 0%        |
| b. After resection                                                                                                | 100%      |
| 6. Do you routinely place a stent in the PD to prevent postintervention pancreatitis?                             |           |
| a. Yes                                                                                                            | 89%       |
| b. Only if PD drainage is deemed suboptimal or if the PD is difficult to cannulate after the procedure            | 11%       |
| c. No                                                                                                             | 0%        |
| 7. Do you cannulate the PD before or after resection?                                                             |           |
| a. Cannulate before resection and perform the resection with guidewire inside the PD.                             | 7%        |
| b. Inject the PD before resection and cannulate it after resection.                                               | 43%       |
| c. Cannulate after resection.                                                                                     | 50%       |
| 8. What kind of PD stent do you use in general?                                                                   |           |
| a. Stent with an internal flap                                                                                    | 46%       |
| b. Stent without an internal flap                                                                                 | 54%       |
| 9. Do you routinely perform biliary sphincterotomy?                                                               |           |
| a. Yes, always                                                                                                    | 32%       |
| b. Only in case of concomitant bile duct stones                                                                   | 57%       |
| c. No, never                                                                                                      | 11%       |
| 10. When you perform biliary sphincterotomy do you in general perform it before or after resection? (n = 25)      |           |
| a. Before resection                                                                                               | 4%        |
| b. After resection                                                                                                | 96%       |
| 11. Do you place a stent in the common bile duct after resection as standard practice?                            |           |
| a. Yes                                                                                                            | 18%       |
| b. No, only on indication                                                                                         | 71%       |
| c. No, never                                                                                                      | 11%       |
| 12. What are the indications to place a stent in the CBD after resection? (n = 20)                                |           |
| a. Bleeding during the procedure                                                                                  | 80%       |
| b. Residual adenomatous tissue                                                                                    | 70%       |
| c. Concerns for microperforations after resection                                                                 | 80%       |

(continued on the next page)

SUPPLEMENTARY TABLE 1. Continued

| Question                                                                                                                              | Agreement |
|---------------------------------------------------------------------------------------------------------------------------------------|-----------|
| d. Advanced resection                                                                                                                 | 25%       |
| e. Multiple submucosal injections                                                                                                     | 5%        |
| f. Extensive piecemeal resection                                                                                                      | 20%       |
| g. Other                                                                                                                              | 30%       |
| 13. What type of biliary stent do you prefer if the bile duct is 8 mm in diameter? (n = 25)                                           |           |
| a. Plastic                                                                                                                            | 72%       |
| b. FCSEMS                                                                                                                             | 28%       |
| 14. What adjunct modality do you use most commonly to remove small (<1 cm) residual tissue during index procedure after papillectomy? |           |
| a. Cold forceps biopsy                                                                                                                | 32%       |
| b. Argon plasma coagulation                                                                                                           | 43%       |
| c. Monopolar/multipolar coagulation probe                                                                                             | 4%        |
| d. Snare tip soft coagulation                                                                                                         | 36%       |
| e. Other                                                                                                                              | 18%       |
| 15. Do you use snare tip soft coagulation of the margins after resection?                                                             |           |
| a. Yes                                                                                                                                | 0%        |
| b. Yes, but only in case of lateral spread                                                                                            | 25%       |
| c. No                                                                                                                                 | 75%       |
| 16. Would you perform RFA when EUS shows ingrowth in the CBD of <1 cm?                                                                |           |
| a. Yes                                                                                                                                | 50%       |
| b. No                                                                                                                                 | 50%       |
| Complications and management                                                                                                          |           |
| 1. Do you standard give rectal indomethacin/diclofenac suppository before resection to prevent postintervention pancreatitis?         |           |
| a. Yes                                                                                                                                | 75%       |
| b. No                                                                                                                                 | 25%       |
| 2. Do you use vigorous hydration to prevent postintervention pancreatitis?                                                            |           |
| a. Yes                                                                                                                                | 54%       |
| b. No                                                                                                                                 | 46%       |
| 3. Do you routinely start patients on PPI after performing an endoscopic papillectomy?                                                |           |
| a. Yes                                                                                                                                | 50%       |
| b. No, only on indication                                                                                                             | 32%       |
| c. No, never                                                                                                                          | 18%       |
| 4. What are the indications to start patients on PPI after performing an endoscopic papillectomy?                                     |           |
| a. Excessive friability of tissue during the procedure                                                                                | 11%       |
| b. Use of antithrombotic medication                                                                                                   | 33%       |
| c. Advanced resection                                                                                                                 | 67%       |
| d. Multiple submucosal injections                                                                                                     | 0%        |
| e. Extensive piecemeal resection                                                                                                      | 67%       |
| f. Other                                                                                                                              | 11%       |
| 5. For how long will you normally treat patients with PPI after performing an endoscopic papillectomy?                                |           |
| a. 24 hours                                                                                                                           | 9%        |
| b. Between 24 hours and 2 weeks                                                                                                       | 39%       |
| c. Between 2 weeks and 1 month                                                                                                        | 52%       |
| d. More than 1 month                                                                                                                  | 0%        |

(continued on the next page)

**SUPPLEMENTARY TABLE 1. Continued**

| Question                                                                                                                                                                          | Agreement |
|-----------------------------------------------------------------------------------------------------------------------------------------------------------------------------------|-----------|
| 6. If bleeding occurs after endoscopic papillectomy and the patient is hemodynamic stable after resuscitation with <2 g/dL drop in hemoglobin, how would you manage it initially? |           |
| a. Continue PPI, but no endoscopic intervention because patient is stable.                                                                                                        | 25%       |
| b. Endoscopic reintervention to treat bleeding.                                                                                                                                   | 64%       |
| c. Other                                                                                                                                                                          | 11%       |
| Follow-up                                                                                                                                                                         |           |
| 1. After which period would you perform the first endoscopic follow-up?                                                                                                           |           |
| a. 3 months                                                                                                                                                                       | 54%       |
| b. 3-6 months                                                                                                                                                                     | 4%        |
| c. 6 months                                                                                                                                                                       | 18%       |
| d. 12 months                                                                                                                                                                      | 4%        |
| e. Other                                                                                                                                                                          | 21%       |
| 2. Which follow-up interval do you use if no residual adenomatous tissue is seen at first follow-up endoscopy?                                                                    |           |
| a. 6 months                                                                                                                                                                       | 46%       |
| b. 12 months                                                                                                                                                                      | 39%       |
| c. >12 months                                                                                                                                                                     | 4%        |
| d. Other                                                                                                                                                                          | 11%       |
| 3. Until when would you perform endoscopic follow-up?                                                                                                                             |           |
| a. Up to 2 years after endoscopic papillectomy                                                                                                                                    | 11%       |
| b. Up to 3 years after endoscopic papillectomy                                                                                                                                    | 14%       |
| c. Up to 5 years after endoscopic papillectomy                                                                                                                                    | 32%       |
| d. Up to 10 years after endoscopic papillectomy                                                                                                                                   | 7%        |
| e. Lifelong, as long as patient is fit                                                                                                                                            | 32%       |
| f. Other                                                                                                                                                                          | 4%        |
| 4. Do you take biopsy samples during follow-up as standard practice?                                                                                                              |           |
| a. Yes                                                                                                                                                                            | 36%       |
| b. No, only when macroscopic abnormalities are present                                                                                                                            | 64%       |
| c. No, never                                                                                                                                                                      | 0%        |

*CBD*, Common bile duct; *CT*, computed tomography; *EMR*, endoscopic mucosal resection; *ERCP*, endoscopic retrograde cholangiopancreatography; *EUS*, endoscopic ultrasound; *FCSEMS*, fully covered self-expanding metal stent; *MRCP*, magnetic resonance cholangiopancreatography; *MRI*, magnetic resonance imaging; *PD*, pancreatic duct; *PPI*, proton pump inhibitor; *RFA*, radiofrequency ablation.



**SUPPLEMENTARY TABLE 2. Survey round 2**

| Question                                                                                                                                                                                                                                                                                                                                                                                      | Agreement |
|-----------------------------------------------------------------------------------------------------------------------------------------------------------------------------------------------------------------------------------------------------------------------------------------------------------------------------------------------------------------------------------------------|-----------|
| Diagnostic workup                                                                                                                                                                                                                                                                                                                                                                             |           |
| Please fill out the order in which you believe the different diagnostic modalities should be performed for different indications (1 = first choice, 2 = only if test(s) of first choice are inconclusive, 3 = only if test(s) of second choice are inconclusive, 4 = only if test(s) of third choice are inconclusive, 5 = only if all earlier performed test(s) are inconclusive, 6 = never) |           |
| 1. In every patient                                                                                                                                                                                                                                                                                                                                                                           |           |
| a. CT                                                                                                                                                                                                                                                                                                                                                                                         | 3 (IQR 4) |
| b. MRCP                                                                                                                                                                                                                                                                                                                                                                                       | 2 (IQR 2) |
| c. EUS                                                                                                                                                                                                                                                                                                                                                                                        | 2 (IQR 1) |
| d. Endoscopic cholangiography                                                                                                                                                                                                                                                                                                                                                                 | 4 (IQR 2) |
| e. Biopsy sampling                                                                                                                                                                                                                                                                                                                                                                            | 1 (IQR 0) |
| 2. In case of jaundice                                                                                                                                                                                                                                                                                                                                                                        |           |
| a. CT                                                                                                                                                                                                                                                                                                                                                                                         | 2 (IQR 2) |
| b. MRCP                                                                                                                                                                                                                                                                                                                                                                                       | 2 (IQR 1) |
| c. EUS                                                                                                                                                                                                                                                                                                                                                                                        | 2 (IQR 1) |
| d. Endoscopic cholangiography                                                                                                                                                                                                                                                                                                                                                                 | 3 (IQR 3) |
| e. Biopsy sampling                                                                                                                                                                                                                                                                                                                                                                            | 1 (IQR 0) |
| 3. In case of cholestatic laboratory features without clinical signs of jaundice                                                                                                                                                                                                                                                                                                              |           |
| a. CT                                                                                                                                                                                                                                                                                                                                                                                         | 2 (IQR 1) |
| b. MRCP                                                                                                                                                                                                                                                                                                                                                                                       | 1 (IQR 1) |
| c. EUS                                                                                                                                                                                                                                                                                                                                                                                        | 2 (IQR 1) |
| d. Endoscopic cholangiography                                                                                                                                                                                                                                                                                                                                                                 | 3 (IQR 2) |
| e. Biopsy sampling                                                                                                                                                                                                                                                                                                                                                                            | 1 (IQR 1) |
| 4. In case of significant weight loss                                                                                                                                                                                                                                                                                                                                                         |           |
| a. CT                                                                                                                                                                                                                                                                                                                                                                                         | 1 (IQR 1) |
| b. MRCP                                                                                                                                                                                                                                                                                                                                                                                       | 2 (IQR 2) |
| c. EUS                                                                                                                                                                                                                                                                                                                                                                                        | 2 (IQR 2) |
| d. Endoscopic cholangiography                                                                                                                                                                                                                                                                                                                                                                 | 4 (IQR 2) |
| e. Biopsy sampling                                                                                                                                                                                                                                                                                                                                                                            | 1 (IQR 1) |
| 5. In case of double duct sign on other imaging                                                                                                                                                                                                                                                                                                                                               |           |
| a. CT                                                                                                                                                                                                                                                                                                                                                                                         | 2 (IQR 1) |
| b. MRCP                                                                                                                                                                                                                                                                                                                                                                                       | 2 (IQR 1) |
| c. EUS                                                                                                                                                                                                                                                                                                                                                                                        | 1 (IQR 1) |
| d. Endoscopic cholangiography                                                                                                                                                                                                                                                                                                                                                                 | 3 (IQR 2) |
| e. Biopsy sampling                                                                                                                                                                                                                                                                                                                                                                            | 1 (IQR 0) |
| 6. In case patient is older than 50 years                                                                                                                                                                                                                                                                                                                                                     |           |
| a. CT                                                                                                                                                                                                                                                                                                                                                                                         | 2 (IQR 2) |
| b. MRCP                                                                                                                                                                                                                                                                                                                                                                                       | 2 (IQR 2) |
| c. EUS                                                                                                                                                                                                                                                                                                                                                                                        | 2 (IQR 1) |
| d. Endoscopic cholangiography                                                                                                                                                                                                                                                                                                                                                                 | 4 (IQR 2) |
| e. Biopsy sampling                                                                                                                                                                                                                                                                                                                                                                            | 1 (IQR 0) |
| 7. In case of large (>2 cm) adenoma                                                                                                                                                                                                                                                                                                                                                           |           |
| a. CT                                                                                                                                                                                                                                                                                                                                                                                         | 2 (IQR 2) |
| b. MRCP                                                                                                                                                                                                                                                                                                                                                                                       | 2 (IQR 1) |
| c. EUS                                                                                                                                                                                                                                                                                                                                                                                        | 1 (IQR 1) |
| d. Endoscopic cholangiography                                                                                                                                                                                                                                                                                                                                                                 | 4 (IQR 2) |
| e. Biopsy sampling                                                                                                                                                                                                                                                                                                                                                                            | 1 (IQR 0) |

*(continued on the next page)*

SUPPLEMENTARY TABLE 2. Continued

| Question                                                                                                                                                                                                                                                                                  | Agreement |
|-------------------------------------------------------------------------------------------------------------------------------------------------------------------------------------------------------------------------------------------------------------------------------------------|-----------|
| 8. In case of endoscopic signs of malignancy                                                                                                                                                                                                                                              |           |
| a. CT                                                                                                                                                                                                                                                                                     | 1 (IQR 1) |
| b. MRCP                                                                                                                                                                                                                                                                                   | 2 (IQR 1) |
| c. EUS                                                                                                                                                                                                                                                                                    | 2 (IQR 1) |
| d. Endoscopic cholangiography                                                                                                                                                                                                                                                             | 3 (IQR 2) |
| e. Biopsy sampling                                                                                                                                                                                                                                                                        | 1 (IQR 0) |
| 9. Do you believe pancreas divisum should be ruled out in every patient before resection?                                                                                                                                                                                                 |           |
| a. Yes                                                                                                                                                                                                                                                                                    | 65%       |
| b. No                                                                                                                                                                                                                                                                                     | 35%       |
| 10. Could you please fill out in which order the following diagnostic modalities should be performed to rule out pancreas divisum before resection? (1 = first choice, 2 = only if first choice is inconclusive, 3 = only if earlier performed test(s) are found inconclusive, 4 = never) |           |
| a. MRCP                                                                                                                                                                                                                                                                                   | 2 (IQR 0) |
| b. EUS                                                                                                                                                                                                                                                                                    | 2 (IQR 0) |
| c. Endoscopic cholangiography                                                                                                                                                                                                                                                             | 3 (IQR 1) |
| 11. Do you believe local extension should be ruled out in every patient before resection?                                                                                                                                                                                                 |           |
| a. Yes                                                                                                                                                                                                                                                                                    | 53%       |
| b. Yes, except for small (<2 cm) adenoma or in case of familial adenomatous polyposis                                                                                                                                                                                                     | 29%       |
| c. No                                                                                                                                                                                                                                                                                     | 18%       |
| 12. Could you please fill out in which order the following diagnostic modalities should be performed to rule out local extension before resection? (1 = first choice, 2 = only if first choice is inconclusive, 3 = only if earlier performed test(s) are found inconclusive, 4 = never)  |           |
| a. MRCP                                                                                                                                                                                                                                                                                   | 2 (IQR 1) |
| b. EUS                                                                                                                                                                                                                                                                                    | 1 (IQR 0) |
| c. Endoscopic cholangiography                                                                                                                                                                                                                                                             | 2 (IQR 1) |
| Lesion assessment and staging                                                                                                                                                                                                                                                             |           |
| 1. When a lesion shows ulceration, this lesion should be defined as most likely malignant.                                                                                                                                                                                                | 94%       |
| 2. The following characteristics are <i>not</i> a reason to define the lesion as most likely malignant                                                                                                                                                                                    |           |
| a. Smooth surface                                                                                                                                                                                                                                                                         | 71%       |
| b. Spontaneous bleeding                                                                                                                                                                                                                                                                   | 53%       |
| c. Lesion size >4 cm                                                                                                                                                                                                                                                                      | 35%       |
| 3. You should refer a patient for surgical management in case of                                                                                                                                                                                                                          |           |
| a. Ingrowth in the PD >1 cm                                                                                                                                                                                                                                                               | 76%       |
| b. Ingrowth in the CBD >1 cm                                                                                                                                                                                                                                                              | 47%       |
| 4. The following situations are <i>not</i> a reason to refer the patient for surgical management                                                                                                                                                                                          |           |
| a. Jaundice                                                                                                                                                                                                                                                                               | 41%       |
| b. Ingrowth in the PD ≤1 cm                                                                                                                                                                                                                                                               | 41%       |
| c. Ingrowth in the CBD ≤1 cm                                                                                                                                                                                                                                                              | 65%       |
| d. An umbilicated lesion                                                                                                                                                                                                                                                                  | 53%       |
| 5. When a lesion shows ulceration, do you believe this patient should be referred for surgical management? (n = 16)                                                                                                                                                                       |           |
| a. Yes, regardless of possible biopsy sampling results                                                                                                                                                                                                                                    | 38%       |
| b. Only when biopsy specimen shows HGD                                                                                                                                                                                                                                                    | 63%       |

(continued on the next page)

SUPPLEMENTARY TABLE 2. Continued

| Question                                                                                                                                                                                                                                                       | Agreement |
|----------------------------------------------------------------------------------------------------------------------------------------------------------------------------------------------------------------------------------------------------------------|-----------|
| 6. If a patient is not a surgical candidate because of age and/or comorbidity, in which of the following situations would you still resect the lesion endoscopically?                                                                                          |           |
| a. There is ingrowth of >1 cm in the CBD                                                                                                                                                                                                                       | 59%       |
| b. There is ingrowth of >1 cm in the PD                                                                                                                                                                                                                        | 35%       |
| c. The lesion shows ulceration                                                                                                                                                                                                                                 | 35%       |
| d. Biopsy sample shows adenocarcinoma                                                                                                                                                                                                                          | 47%       |
| e. In none of the above described situations                                                                                                                                                                                                                   | 29%       |
| f. Other                                                                                                                                                                                                                                                       | 0%        |
| 7. When there is ingrowth in the CBD of >1 cm, would you consider endoscopic papillectomy with RFA?                                                                                                                                                            |           |
| a. In a fit 60-year-old patient                                                                                                                                                                                                                                | 47%       |
| b. In a patient who is not a surgical candidate because of age and/or comorbidity                                                                                                                                                                              | 76%       |
| 8. Do you believe any advanced imaging techniques (such as narrow-band imaging or chromoendoscopy) would be helpful to distinguish between benign and malignant lesions?                                                                                       |           |
| a. Yes                                                                                                                                                                                                                                                         | 29%       |
| b. No                                                                                                                                                                                                                                                          | 71%       |
| 9. If the biopsy sample shows LGD, which of the following characteristics would make you to refer the patient for surgical management? (0 = would not take this into account, 5 = would refer patient for surgical treatment based on the sole characteristic) |           |
| a. Ulceration                                                                                                                                                                                                                                                  | 4 (IQR 1) |
| b. Smooth or irregular surface                                                                                                                                                                                                                                 | 2 (IQR 2) |
| c. Excessive friability                                                                                                                                                                                                                                        | 1 (IQR 3) |
| d. Firm consistency                                                                                                                                                                                                                                            | 3 (IQR 2) |
| e. Immobility                                                                                                                                                                                                                                                  | 4 (IQR 1) |
| f. Spontaneous bleeding                                                                                                                                                                                                                                        | 2 (IQR 3) |
| g. Tumor size >4 cm                                                                                                                                                                                                                                            | 2 (IQR 2) |
| 10. If the biopsy sample shows HGD, which of the following characteristics would make you to refer the patient for surgical management?                                                                                                                        |           |
| a. Ulceration                                                                                                                                                                                                                                                  | 4 (IQR 1) |
| b. Smooth or irregular surface                                                                                                                                                                                                                                 | 3 (IQR 3) |
| c. Excessive friability                                                                                                                                                                                                                                        | 4 (IQR 3) |
| d. Firm consistency                                                                                                                                                                                                                                            | 4 (IQR 1) |
| e. Immobility                                                                                                                                                                                                                                                  | 4 (IQR 0) |
| f. Spontaneous bleeding                                                                                                                                                                                                                                        | 4 (IQR 2) |
| g. Tumor size >4 cm                                                                                                                                                                                                                                            | 3 (IQR 2) |
| Technical aspects                                                                                                                                                                                                                                              |           |
| 1. Resection of the lesion should be performed at the plane of the duodenal wall.                                                                                                                                                                              | 94%       |
| 2. Endoscopic papillectomy should be performed with fractionated current.                                                                                                                                                                                      | 94%       |
| 3. Submucosal injection should only be performed in case of a laterally spreading lesion.                                                                                                                                                                      | 88%       |
| 4. If pancreatic sphincterotomy is performed, then it should be performed after resection.                                                                                                                                                                     | 88%       |
| 5. PD stent should be placed routinely to prevent postintervention pancreatitis.                                                                                                                                                                               | 100%      |
| 6. PD should be cannulated after resection.                                                                                                                                                                                                                    | 100%      |
| 7. If biliary sphincterotomy is performed, it should be performed after resection.                                                                                                                                                                             | 100%      |
| 8. A CBD stent should only be placed on indication.                                                                                                                                                                                                            | 82%       |
| 9. A CBD stent should be placed in the following cases:                                                                                                                                                                                                        |           |
| a. In case of bleeding during the procedure.                                                                                                                                                                                                                   | 76%       |
| b. If there are any concerns for microperforations.                                                                                                                                                                                                            | 88%       |
| c. In case of residual adenomatous tissue.                                                                                                                                                                                                                     | 59%       |

(continued on the next page)

SUPPLEMENTARY TABLE 2. Continued

| Question                                                                                                            | Agreement |
|---------------------------------------------------------------------------------------------------------------------|-----------|
| 10. STSC of the margins after endoscopic papillectomy should <i>not</i> be performed.                               | 65%       |
| 11. When do you believe a pancreatic sphincterotomy should be performed?                                            |           |
| a. Never                                                                                                            | 29%       |
| b. In case of intrapancreatic duct extent                                                                           | 59%       |
| c. In case of pancreas divisum instead of PD stent                                                                  | 6%        |
| d. Other                                                                                                            | 12%       |
| 12. Do you believe it is better to inject the PD before resection to make it easier to find the PD after resection? |           |
| a. Yes                                                                                                              | 41%       |
| b. No                                                                                                               | 59%       |
| 13. Which kind of PD stent would you choose in the following situations?                                            |           |
| a. Always with an internal flap                                                                                     | 47%       |
| b. Always without an internal flap                                                                                  | 35%       |
| c. Without an internal flap, but in case of large (>2 cm) lesions                                                   | 0%        |
| d. Without an internal flap, but in case of perforation                                                             | 18%       |
| e. Without an internal flap, but after coagulation or RFA                                                           | 18%       |
| f. Other                                                                                                            | 0%        |
| 14. When would you perform biliary sphincterotomy?                                                                  |           |
| a. Always                                                                                                           | 18%       |
| b. In case of bile duct stones                                                                                      | 76%       |
| c. In case of drainage is deemed suboptimal                                                                         | 53%       |
| d. Other                                                                                                            | 6%        |
| 15. Which stent do you prefer in a bile duct with diameter $\leq 8$ mm in the following cases                       |           |
| a. Bleeding during the procedure                                                                                    |           |
| i. Plastic                                                                                                          | 41%       |
| ii. FCSEMS                                                                                                          | 59%       |
| iii. No stent                                                                                                       | 0%        |
| b. Concerns for microperforations after resection                                                                   |           |
| i. Plastic                                                                                                          | 35%       |
| ii. FCSEMS                                                                                                          | 65%       |
| iii. No stent                                                                                                       | 0%        |
| c. Residual tissue                                                                                                  |           |
| i. Plastic                                                                                                          | 29%       |
| ii. FCSEMS                                                                                                          | 71%       |
| iii. No stent                                                                                                       | 0%        |
| 16. Which stent do you prefer in a bile duct with diameter >8 mm in the following cases                             |           |
| a. Bleeding during the procedure                                                                                    |           |
| i. Plastic                                                                                                          | 24%       |
| ii. FCSEMS                                                                                                          | 65%       |
| iii. No stent                                                                                                       | 12%       |
| b. Concerns for microperforations after resection                                                                   |           |
| i. Plastic                                                                                                          | 18%       |
| ii. FCSEMS                                                                                                          | 71%       |
| iii. No stent                                                                                                       | 12%       |

(continued on the next page)

SUPPLEMENTARY TABLE 2. Continued

| Question                                                                                                                          | Agreement |
|-----------------------------------------------------------------------------------------------------------------------------------|-----------|
| c. Residual tissue                                                                                                                |           |
| i. Plastic                                                                                                                        | 41%       |
| ii. FCSEMS                                                                                                                        | 35%       |
| iii. No stent                                                                                                                     | 24%       |
| 17. What adjunct modalities would you consider to remove small (<1 cm) residual tissue during index procedure after papillectomy? |           |
| a. Cold forceps biopsy sampling                                                                                                   | 65%       |
| b. APC                                                                                                                            | 53%       |
| c. Monopolar/multipolar coagulation probe                                                                                         | 12%       |
| d. STSC                                                                                                                           | 18%       |
| e. Hot snare                                                                                                                      | 41%       |
| f. Cold snare                                                                                                                     | 53%       |
| g. Other                                                                                                                          | 6%        |
| 18. How would you resect the lesion when EUS shows ingrowth in the CBD of <1 cm?                                                  |           |
| a. Snare resection in combination with RFA                                                                                        | 24%       |
| b. Snare resection in combination with APC                                                                                        | 35%       |
| c. Resect intraductal residue in second procedure                                                                                 | 47%       |
| d. Resect intraductal residue in second procedure after placement of FCSEMS during first procedure                                | 18%       |
| e. Other                                                                                                                          | 6%        |
| 19. Do you standardly use clips to close the defect after resection?                                                              |           |
| a. Yes                                                                                                                            | 41%       |
| b. No                                                                                                                             | 59%       |
| 20. Do you standardly give buscopan or glucagon before resection to reduce the risk of loss of specimen further in the GI tract?  |           |
| a. Yes                                                                                                                            | 59%       |
| b. No                                                                                                                             | 41%       |
| 21. Would you use a different current to resect the lesion based on the size of the lesion?                                       |           |
| a. Large (>2 cm) lesion                                                                                                           |           |
| i. Pure coagulation current                                                                                                       | 0%        |
| ii. Pure cutting current                                                                                                          | 6%        |
| iii. Fractionated current                                                                                                         | 94%       |
| b. Small (<2 cm) lesion                                                                                                           |           |
| i. Pure coagulation current                                                                                                       | 6%        |
| ii. Pure cutting current                                                                                                          | 24%       |
| iii. Fractionated current                                                                                                         | 71%       |
| Complications and management                                                                                                      |           |
| 1. Rectal indomethacin or diclofenac should be given before resection.                                                            | 82%       |
| 2. If bleeding occurs during intervention, which modalities to stop the bleeding would you consider?                              |           |
| a. FCSEMS                                                                                                                         | 71%       |
| b. Coagulation grasper                                                                                                            | 65%       |
| c. Goldprobe                                                                                                                      | 12%       |
| d. Hemospray                                                                                                                      | 41%       |
| e. STSC                                                                                                                           | 24%       |
| f. APC                                                                                                                            | 12%       |
| g. Other                                                                                                                          | 35%       |

(continued on the next page)

## SUPPLEMENTARY TABLE 2. Continued

| Question                                                                                                                                                                            | Agreement |
|-------------------------------------------------------------------------------------------------------------------------------------------------------------------------------------|-----------|
| 3. When would you start patients on PPI after performing an endoscopic papillectomy?                                                                                                |           |
| a. Always                                                                                                                                                                           | 65%       |
| b. Extensive friability of the tissue during the procedure                                                                                                                          | 6%        |
| c. Use of antithrombotic medication                                                                                                                                                 | 0%        |
| d. Advanced resection of large lesion                                                                                                                                               | 24%       |
| e. Multiple submucosal injections                                                                                                                                                   | 6%        |
| f. Extensive piecemeal resection                                                                                                                                                    | 18%       |
| g. Never                                                                                                                                                                            | 12%       |
| 4. How long do you believe patients should be treated with PPI after resection?                                                                                                     |           |
| a. 24 hours                                                                                                                                                                         | 6%        |
| b. 48 hours                                                                                                                                                                         | 0%        |
| c. 1 week                                                                                                                                                                           | 24%       |
| d. 2 weeks                                                                                                                                                                          | 18%       |
| e. 3 weeks                                                                                                                                                                          | 0%        |
| f. 1 month                                                                                                                                                                          | 47%       |
| 5. If a bleeding occurs after endoscopic papillectomy and the patient is hemodynamic stable after resuscitation with <2-g/dL drop in hemoglobin, how would you manage it initially? |           |
| a. Expectative (continue or start PPI), no endoscopic intervention because patient is stable                                                                                        | 41%       |
| b. Endoscopic reintervention to treat bleeding within working hours                                                                                                                 | 47%       |
| c. Endoscopic reintervention to treat bleeding as an emergency procedure                                                                                                            | 12%       |
| Follow-up                                                                                                                                                                           |           |
| 1. Do you standardly admit patients for observation after endoscopic papillectomy? If yes, how long, if no complications occur?                                                     |           |
| a. 6 hours                                                                                                                                                                          | 0%        |
| b. 24 hours                                                                                                                                                                         | 29%       |
| c. 48 hours                                                                                                                                                                         | 35%       |
| d. Other                                                                                                                                                                            |           |
| i. No                                                                                                                                                                               | 18%       |
| ii. >48 hours                                                                                                                                                                       | 18%       |
| 2. After which period should first follow-up be performed after presumed complete removal (excluding the removal of possible placed stents within 1-3 months)?                      |           |
| a. In case initial pathology shows LGD                                                                                                                                              |           |
| i. 3 months                                                                                                                                                                         | 35%       |
| ii. 3-6 months                                                                                                                                                                      | 29%       |
| iii. 6 months                                                                                                                                                                       | 24%       |
| iv. 6-12 months                                                                                                                                                                     | 12%       |
| v. >12 months                                                                                                                                                                       | 0%        |
| b. In case initial pathology shows HGD                                                                                                                                              |           |
| i. 3 months                                                                                                                                                                         | 76%       |
| ii. 3-6 months                                                                                                                                                                      | 24%       |
| iii. 6 months                                                                                                                                                                       | 0%        |
| iv. 6-12 months                                                                                                                                                                     | 0%        |
| v. >12 months                                                                                                                                                                       | 0%        |

(continued on the next page)

SUPPLEMENTARY TABLE 2. Continued

| Question                                                                                   | Agreement |
|--------------------------------------------------------------------------------------------|-----------|
| 3. What should be the follow-up interval if no residual tissue is seen at first follow-up? |           |
| a. In case initial pathology shows LGD                                                     |           |
| i. 6 months                                                                                | 35%       |
| ii. 12 months                                                                              | 53%       |
| iii. >12 months                                                                            | 12%       |
| b. In case initial pathology shows HGD                                                     |           |
| i. 6 months                                                                                | 65%       |
| ii. 12 months                                                                              | 35%       |
| iii. >12 months                                                                            | 0%        |
| 4. Until when should endoscopic follow-up be performed?                                    |           |
| a. In case initial pathology shows LGD                                                     |           |
| i. Up to 2 years                                                                           | 12%       |
| ii. Up to 3 years                                                                          | 12%       |
| iii. Up to 5 years                                                                         | 41%       |
| iv. Up to 10 years                                                                         | 12%       |
| v. Lifelong, as long as patient is fit                                                     | 24%       |
| b. In case initial pathology shows HGD                                                     |           |
| i. Up to 2 years                                                                           | 12%       |
| ii. Up to 3 years                                                                          | 0%        |
| iii. Up to 5 years                                                                         | 47%       |
| iv. Up to 10 years                                                                         | 6%        |
| v. Lifelong, as long as patient is fit                                                     | 35%       |
| 5. Should biopsy samples be taken routinely at first follow-up?                            |           |
| a. In case initial pathology shows LGD                                                     |           |
| i. Yes                                                                                     | 29%       |
| ii. No, only when macroscopic abnormalities are present                                    | 71%       |
| b. In case initial pathology shows HGD                                                     |           |
| i. Yes                                                                                     | 35%       |
| ii. No, only when macroscopic abnormalities are present                                    | 65%       |
| 6. Should biopsy samples be taken routinely at further follow-up?                          |           |
| a. In case initial pathology shows LGD                                                     |           |
| i. Yes                                                                                     | 18%       |
| ii. No, only when macroscopic abnormalities are present                                    | 82%       |
| b. In case initial pathology shows HGD                                                     |           |
| i. Yes                                                                                     | 35%       |
| ii. No, only when macroscopic abnormalities are present                                    | 65%       |

CBD, Common bile duct; CT, computed tomography; EUS, endoscopic ultrasound; FCSEMS, fully covered self-expanding metal stent; IQR, interquartile range; HGD, high-grade dysplasia; LGD, low-grade dysplasia; MRCP, magnetic resonance cholangiopancreatography; MRI, magnetic resonance imaging; STSC, snare tip soft coagulation; APC, argon plasma coagulation; PD, pancreatic duct; PPI, proton pump inhibitor; RFA, radiofrequency ablation.

SUPPLEMENTARY TABLE 3. Survey round 3

| Question                                                                                                                                                                                                                                                                            | Agreement |
|-------------------------------------------------------------------------------------------------------------------------------------------------------------------------------------------------------------------------------------------------------------------------------------|-----------|
| <b>Diagnostic workup statements</b>                                                                                                                                                                                                                                                 |           |
| 1. Gastroduodenoscopy (with side-viewing instrument) should always be performed before resection.                                                                                                                                                                                   | 100%      |
| 2. Biopsy sampling should always be performed before resection.                                                                                                                                                                                                                     | 94%       |
| 3. Either MRI/MRCP or EUS should be performed in every patient before resection.                                                                                                                                                                                                    | 63%       |
| 4. Either MRI/MRCP or EUS should be performed in case of cholestatic laboratory features with or without jaundice.                                                                                                                                                                  | 81%       |
| 5. Either CT, MRI/MRCP or EUS should be performed in case of cholestatic laboratory features with or without jaundice.                                                                                                                                                              | 75%       |
| 6. CT should be performed in case of jaundice.                                                                                                                                                                                                                                      | 75%       |
| 7. Either MRI/MRCP or EUS should be performed in case of a lesion larger than 2 cm.                                                                                                                                                                                                 | 75%       |
| 8. Either MRI/MRCP or CT should be performed in case of significant weight loss.                                                                                                                                                                                                    | 81%       |
| 9. Either EUS, MRI/MRCP, or CT should be performed in case of significant weight loss.                                                                                                                                                                                              | 63%       |
| 10. Either MRI/MRCP or CT should be performed in case of endoscopic signs of malignancy.                                                                                                                                                                                            | 81%       |
| 11. Either CT or EUS should be performed in case of endoscopic signs of malignancy.                                                                                                                                                                                                 | 69%       |
| 12. Either MRI/MRCP, EUS, or CT should be performed in case of endoscopic signs of malignancy.                                                                                                                                                                                      | 81%       |
| 13. An endoscopic cholangiogram either before or during endoscopic papillectomy should only be performed if other performed tests are found inconclusive and there is still doubt about the presence of intraductal extension.                                                      | 44%       |
| <b>Lesion assessment and staging</b>                                                                                                                                                                                                                                                |           |
| 1. Patient should be referred for surgical management in case of ingrowth in the CBD of more than 1 cm, considering patient is suitable for surgery.                                                                                                                                | 81%       |
| 2. If biopsy sample shows LGD and ulceration is present, the lesion could still be resected endoscopically; there is no need to refer the patient for surgical management based on this sole characteristic, considering the lesion seems favorable for endoscopic resection.       | 88%       |
| 3. If biopsy sample shows HGD and ulceration is present, the lesion could still be resected endoscopically; there is no need to refer the patient for surgical management based on this sole characteristic, considering the lesion seems favorable for endoscopic resection.       | 63%       |
| 4. If there is ingrowth in the CBD of more than 1 cm, endoscopic resection can still be considered if the patient is not a surgical candidate because of age and/or comorbidity, considering the lesion seems favorable for endoscopic resection.                                   | 81%       |
| 5. If biopsy sample shows adenocarcinoma in situ or well-differentiated adenocarcinoma, endoscopic resection can still be considered if the patient is not a surgical candidate because of age and/or comorbidity, considering the lesion seems favorable for endoscopic resection. | 75%       |
| 6. If there is ingrowth in the CBD of more than 1 cm, endoscopic papillectomy with RFA should <i>not</i> be performed in a fit 60-year-old patient.                                                                                                                                 | 44%       |
| 7. If there is ingrowth in the CBD of more than 1 cm, endoscopic papillectomy with RFA can be considered in a patient that is not a surgical candidate because of age and/or comorbidity, considering the lesion seems favorable for endoscopic resection.                          | 75%       |
| <b>Technical aspects</b>                                                                                                                                                                                                                                                            |           |
| 1. Snare tip soft coagulation of the margins should <i>not</i> be performed after endoscopic papillectomy.                                                                                                                                                                          | 56%       |
| 2. Snare tip soft coagulation can be performed for the margins of the laterally spreading component, but not the papillary margins.                                                                                                                                                 | 50%       |
| 3. Pancreatic sphincterotomy after resection should only be performed in case of extension in the pancreatic duct.                                                                                                                                                                  | 38%       |
| 4. Pancreatic sphincterotomy after resection should be performed in case of extension in the pancreatic duct or if drainage is deemed suboptimal.                                                                                                                                   | 44%       |
| 5. It can be helpful to inject the PD before resection to make it easier to find the PD after resection in case of extension in the pancreatic duct.                                                                                                                                | 44%       |
| 6. Biliary sphincterotomy should be performed only in case of concomitant bile duct stones.                                                                                                                                                                                         | 44%       |
| 7. Biliary sphincterotomy should be performed in case of concomitant bile duct stones and in case drainage is deemed suboptimal.                                                                                                                                                    | 81%       |
| 8. In case there is bleeding during the procedure, an FCSEMS instead of a plastic stent should be placed in the CBD.                                                                                                                                                                | 63%       |
| 9. In case there are concerns for microperforations in the papillary region, an FCSEMS should be placed in the CBD.                                                                                                                                                                 | 88%       |

(continued on the next page)



SUPPLEMENTARY TABLE 3. Continued

| Question                                                                                                                                                                                                                | Agreement      |
|-------------------------------------------------------------------------------------------------------------------------------------------------------------------------------------------------------------------------|----------------|
| 10. In case there are concerns for residual adenomatous tissue in the distal part of the CBD, an FCSEMS should be placed in the CBD.                                                                                    | 31%            |
| 11. In case there are concerns for residual adenomatous tissue in the distal part of the CBD, either a plastic stent or FCSEMS should be placed in the CBD.                                                             | 44%            |
| 12. Please rank the following items in which order you would consider them if there is ingrowth in the CBD of <1 cm, which seems accessible from the duodenum. (1 = first choice, 5 = never)                            |                |
| a. Snare resection in combination with RFA                                                                                                                                                                              | 2 (IQR 1.5)    |
| b. Snare resection in combination with APC                                                                                                                                                                              | 3 (IQR 3.25)   |
| c. Resect intraductal residue in second procedure after placement of FCSEMS during first procedure                                                                                                                      | 3 (IQR 1.25)   |
| d. Resect with snare inside duct                                                                                                                                                                                        | 2.5 (IQR 2.25) |
| 13. Standard clip closure of the mucosal defect after resection should <i>not</i> be performed.                                                                                                                         | 38%            |
| 14. Glucagon or buscopan should be provided routinely before resection to reduce the risk of losing the specimen into the GI tract.                                                                                     | 56%            |
| Adverse events and management                                                                                                                                                                                           |                |
| 1. Vigorous hydration should be considered in patients without any cardiologic comorbidity to further decrease the risk of postintervention pancreatitis.                                                               | 63%            |
| Please rank the following methods in which order you would consider them to use in case of intraprocedural bleeding in the following hypothetical situations (1 = first choice, 6 = never)                              |                |
| 2. In case of bleeding from the papillectomy site (not from lateral spreading component) considering the PD is already protected by a stent.                                                                            |                |
| a. FCSEMS                                                                                                                                                                                                               | 3.5 (IQR 1.5)  |
| b. Hemospray                                                                                                                                                                                                            | 5 (IQR 2)      |
| c. Epinephrine                                                                                                                                                                                                          | 2 (IQR 1.25)   |
| d. Clips                                                                                                                                                                                                                | 3 (IQR 1)      |
| e. Coagulation probe (or other instrument used to coagulate)                                                                                                                                                            | 2 (IQR 1)      |
| 3. In case of bleeding from the papillectomy site (not from lateral spreading component) however the PD is not yet protected by a stent.                                                                                |                |
| a. FCSEMS                                                                                                                                                                                                               | 4 (IQR 2.25)   |
| b. Hemospray                                                                                                                                                                                                            | 4 (IQR 3)      |
| c. Epinephrine                                                                                                                                                                                                          | 1 (IQR 1)      |
| d. Clips                                                                                                                                                                                                                | 3 (IQR 3.25)   |
| e. Coagulation probe (or other instrument used to coagulate)                                                                                                                                                            | 2 (IQR 2)      |
| 4. In case of bleeding from the lateral spreading component.                                                                                                                                                            |                |
| a. FCSEMS                                                                                                                                                                                                               | 5.5 (IQR 1)    |
| b. Hemospray                                                                                                                                                                                                            | 4 (IQR 2)      |
| c. Epinephrine                                                                                                                                                                                                          | 2 (IQR 2)      |
| d. Clips                                                                                                                                                                                                                | 2.5 (IQR 2)    |
| e. Coagulation probe (or other instrument used to coagulate)                                                                                                                                                            | 2 (IQR 1)      |
| 5. Every patient should be treated with PPI after performing an endoscopic papillectomy.                                                                                                                                | 69%            |
| 6. Patients treated with PPI after resection should be treated for at least 2 weeks.                                                                                                                                    | 69%            |
| 7. Patients treated with PPI after resection should be treated for at least 1 month.                                                                                                                                    | 56%            |
| 8. If a bleeding occurs after endoscopic papillectomy and the patient is hemodynamic stable after resuscitation with <2-g/dL drop in hemoglobin, reintervention should be performed within 12 hours.                    | 38%            |
| 9. If a bleeding occurs after endoscopic papillectomy and the patient is hemodynamic stable after resuscitation with <2-g/dL drop in hemoglobin, conservative treatment (continue or start PPI) is initially indicated. | 63%            |

(continued on the next page)

SUPPLEMENTARY TABLE 3. Continued

| Question                                                                                                 | Agreement |
|----------------------------------------------------------------------------------------------------------|-----------|
| Follow-up                                                                                                |           |
| 1. Every patient should be admitted for at least 24 hours for observation after endoscopic papillectomy. | 69%       |
| 2. Every patient should be admitted for at least 48 hours for observation after endoscopic papillectomy. | 44%       |
| 3. In case initial pathology shows LGD                                                                   |           |
| a. First follow-up (after removal of possible placed stents) should be performed within 6 months.        | 81%       |
| b. First follow-up (after removal of possible placed stents) should be performed within 3 months.        | 56%       |
| c. At first follow-up biopsy samples should only be taken when macroscopic abnormalities are present.    | 94%       |
| d. Follow-up interval should be 12 months or less.                                                       | 88%       |
| e. Follow-up interval should be 6 months or less.                                                        | 38%       |
| f. At further follow-up biopsy samples should only be taken when macroscopic abnormalities are present.  | 94%       |
| g. Follow-up should be performed for at least 5 years.                                                   | 81%       |
| h. Follow-up should be performed lifelong, as long as patient is fit.                                    | 31%       |
| 4. In case initial pathology shows HGD                                                                   |           |
| a. First follow-up (after removal of possible placed stents) should be performed within 6 months.        | 31%       |
| b. First follow-up (after removal of possible placed stents) should be performed within 3 months.        | 94%       |
| c. At first follow-up biopsy samples should only be taken when macroscopic abnormalities are present.    | 81%       |
| d. Follow-up interval should be 12 months or less.                                                       | 25%       |
| e. Follow-up interval should be 6 months or less.                                                        | 94%       |
| f. At further follow-up biopsy samples should only be taken when macroscopic abnormalities are present.  | 81%       |
| g. Follow-up should be performed for at least 5 years.                                                   | 75%       |
| h. Follow-up should be performed lifelong, as long as patient is fit.                                    | 38%       |

*CBD*, Common bile duct; *CT*, computed tomography; *EUS*, endoscopic ultrasound; *MRCP*, magnetic resonance cholangiopancreatography; *MRI*, magnetic resonance imaging; *FCSEMS*, fully covered self-expanding metal stent; *HGD*, high-grade dysplasia; *LGD*, low-grade dysplasia; *STSC*, snare tip soft coagulation; *APC*, argon plasma coagulation; *PD*, pancreatic duct; *PPI*, proton pump inhibitor; *RFA*, radiofrequency ablation.
